# Supplementary material for: Genetic requirements and transcriptomics of Helicobacter pylori biofilm formation on abiotic and biotic surfaces
Source: PubMed Central journal article supplement (PMC7695850; doi:10.1038/s41522-020-00167-3), 2020-11-27
Supplement: 41522_2020_167_MOESM1_ESM.pdf [file 41522_2020_167_MOESM1_ESM.pdf]

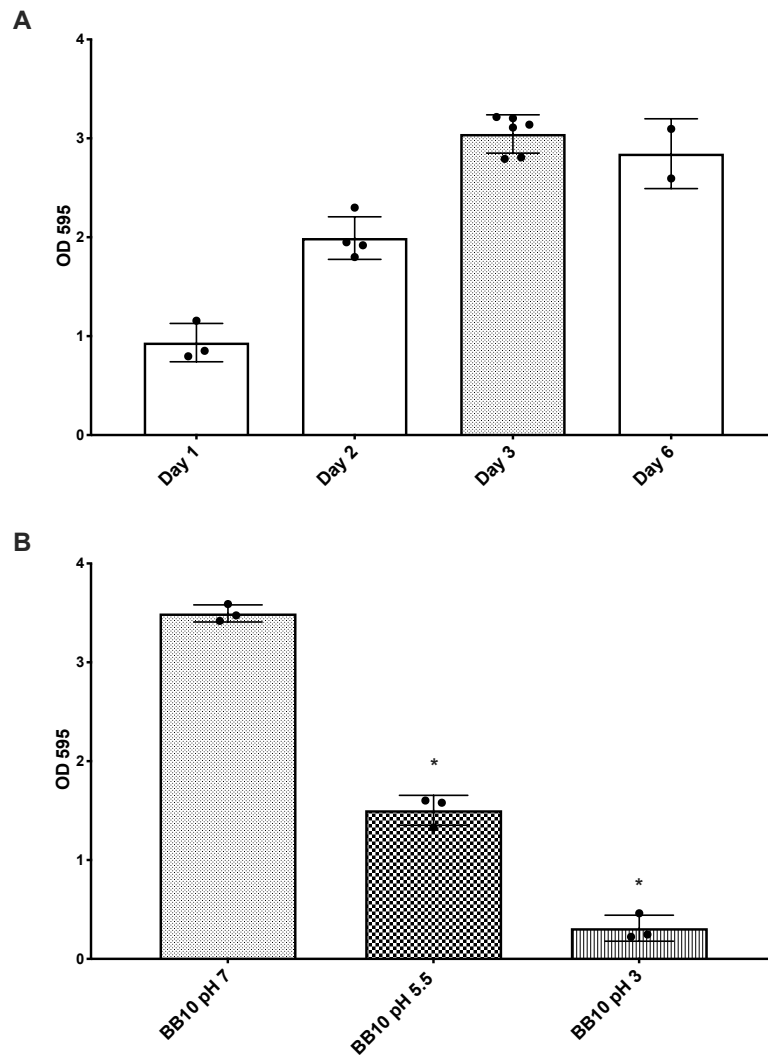

**Supplementary Figure 1. *H. pylori* G27 biofilms is time and pH-dependent.** (A) Biofilm formation of *H. pylori* strains were assessed using the microtiter plate biofilm assay at different time points. (B) Effect of pH variation on biofilm development, using BB10 pHed to different values and its normal, pH 7. Results represent the crystal violet absorbance at 595nm which reflect the biofilm biomass. Experiments were performed three independent times with at least 3 technical replicates for each. Error bars represent standard errors of the mean for each average value. Statistical analyses were performed using ANOVA (\*,  $P < 0.05$ )

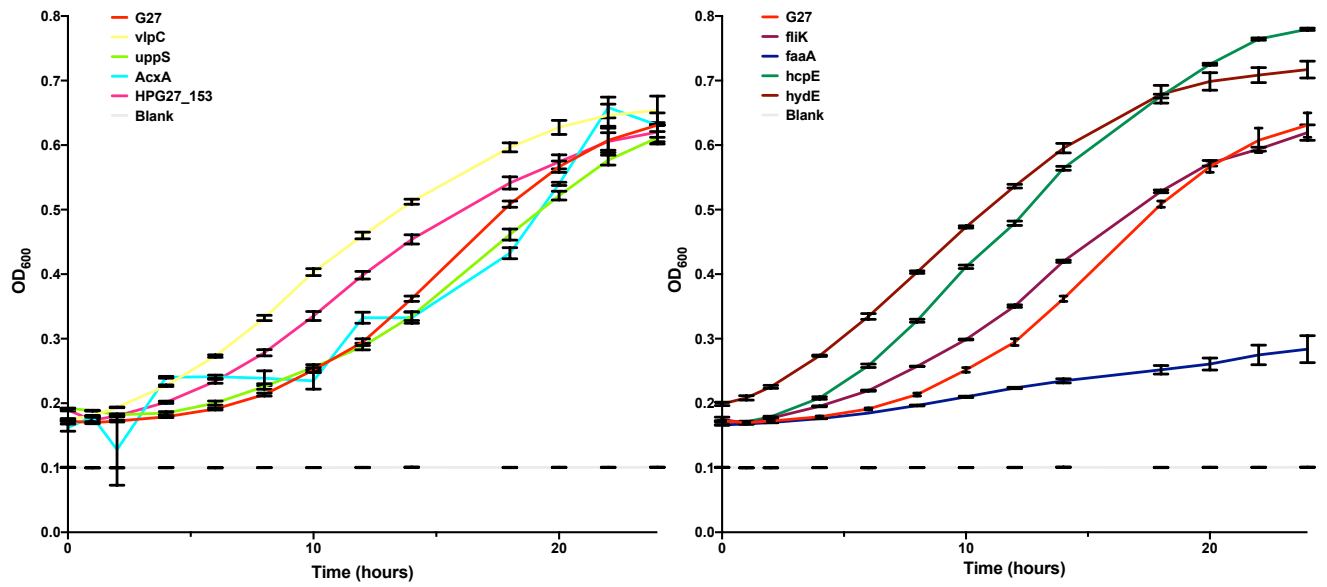

**Supplementary Figure 2. Growth curves of WT G27 strain and biofilm-defective mutants.** Overnight cultures were diluted to OD 0.2 into fresh media under agitation (Tecan Infinite F200, 360rpm). Optical densities were monitored by measured at A 600nm at various time points. The data shown are mean  $\pm$  SD of triplicate experiment.

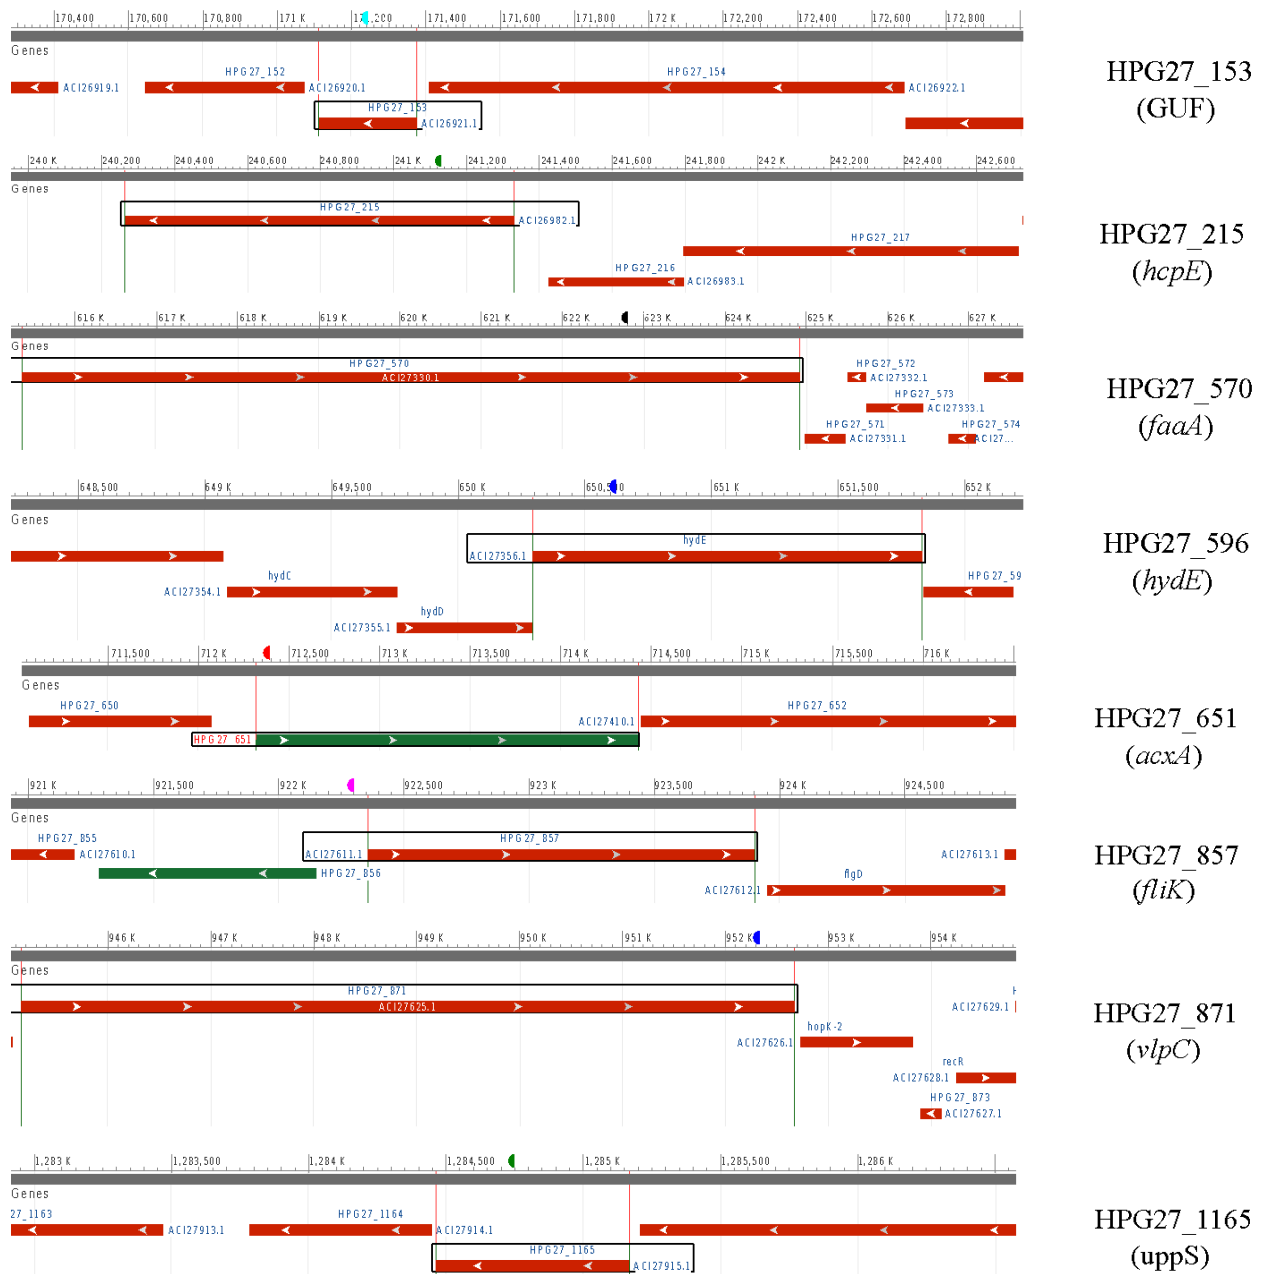

**Supplementary Figure 3. Graphical map showing the position and surrounding regions of the insertion site of Tn7 transposon in biofilm-defective mutants.** Boxes represent the flanking open reading frame and colored line represent the genomic position of the transposon insertion.

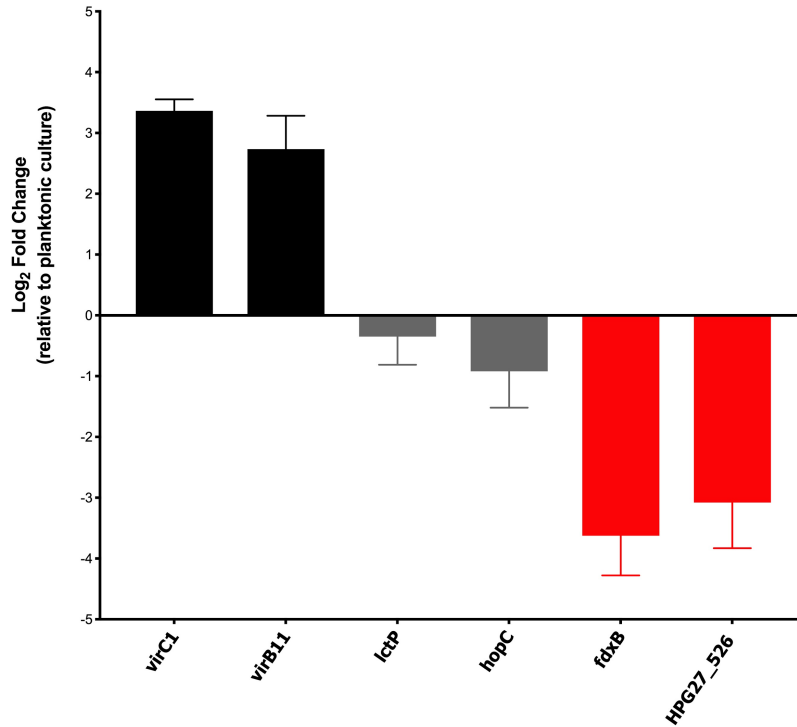

**Supplementary Figure 4. qPCR validation of the transcription of selected differentially expressed genes.** The data indicate the fold change in expression of genes in *H. pylori* biofilm cells compared to planktonic cells. Fold changes in gene expressions were calculated after normalization of each gene with the constitutively expressed gene control *gapB*. Bars represent the mean and error bars the standard error of the mean. Black and gray bars represent qPCR and RNA-seq results, respectively. Statistical analyses were performed using threshold cycle ( $2^{-\Delta\Delta CT}$ ) values, and all results were statistically significant ( $P < 0.01$ ) except for *lctP* and *hopC* gene transcripts.

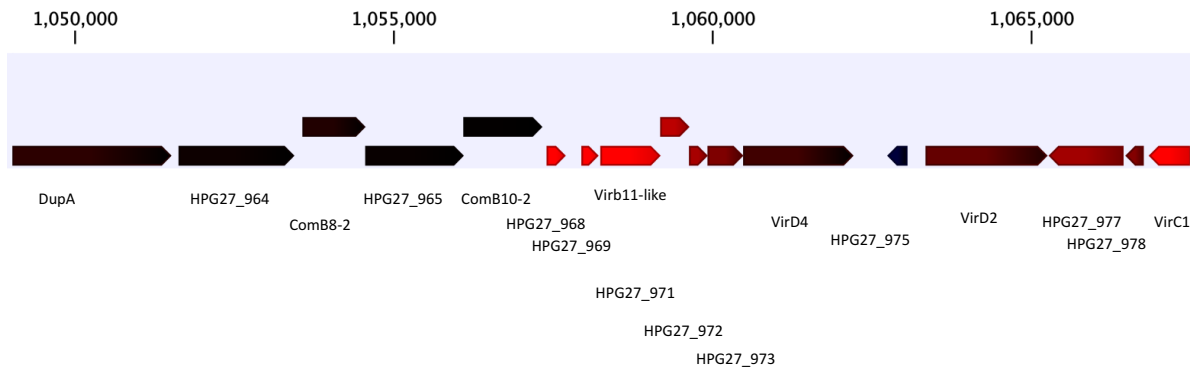

**Figure S5. Genes expression of Type IV secretion system 4 (tfs4) genes in *H. pylori* G27 cell grown in biofilm condition.** Red represent genes that are up-regulated in cells grown in biofilm condition and higher intensity of red denotes greater fold-change.

**Supplementary Table 1.****List of plasmids used in the present study.**

| Plasmid           | Description                                                                            | Source     |
|-------------------|----------------------------------------------------------------------------------------|------------|
| pTwist_Amp_526    | Clonig pTwist vector harboring <i>HPG27_526::Cm<sup>R</sup></i> ,<br>Amp <sup>R</sup>  | This study |
| pTwist_Amp_166    | Clonig pTwist vector harboring <i>HPG27_166::kan<sup>R</sup></i> ,<br>Amp <sup>R</sup> | This study |
| pTwist_Amp_715    | Clonig pTwist vector harboring <i>HPG27_715::Cm<sup>R</sup></i> ,<br>Amp <sup>R</sup>  | This study |
| pTwist_Amp_1233   | Clonig pTwist vector harboring <i>HPG27_1233::Cm<sup>R</sup></i> ,<br>Amp <sup>R</sup> | This study |
| pTwist_Amp_1066   | Clonig pTwist vector harboring <i>HPG27_1066::Cm<sup>R</sup></i> ,<br>Amp <sup>R</sup> | This study |
| pTwist_Amp_ΔacsA  | Clonig pTwist vector harboring <i>acsA::Cm<sup>R</sup></i> , Amp <sup>R</sup>          | This study |
| pTwist_Amp_ΔAcxAB | Clonig pTwist vector harboring <i>acxAB::Cm<sup>R</sup></i> , Amp <sup>R</sup>         | This study |
| pTwist_Amp_ΔhydE  | Clonig pTwist vector harboring <i>hydE::Cm<sup>R</sup></i> , Amp <sup>R</sup>          | This study |

**Supplementary Table 2.**

**Full list of up-regulated genes in *H. pylori* G27 grown in biofilm condition (cutoff ratio  $\geq 1$  log<sub>2</sub> fold change and p-value  $<0.05$ ) using RNA-seq analysis.** These genes are all expressed to higher levels in the biofilm cells.

| Name       | Putative gene product                                          | Fold change |
|------------|----------------------------------------------------------------|-------------|
| HPG27_166  | Hypothetical protein                                           | 12.13       |
| HPG27_979  | VirC1                                                          | 9.07        |
| HPG27_970  | VirB11-like                                                    | 6.43        |
| HPG27_1233 | <sup>m6</sup> A methyltransferase                              | 6.35        |
| HPG27_969  | Hypothetical protein                                           | 5.93        |
| HPG27_1522 | Hypothetical protein                                           | 4.72        |
| HPG27_270  | Chorismate mutase                                              | 4.59        |
| HPG27_968  | Hypothetical protein                                           | 4.46        |
| HPG27_509  | Glutamate racemase                                             | 3.92        |
| HPG27_1066 | <sup>m5</sup> C methyltransferase                              | 3.89        |
| HPG27_324  | RluA, pseudouridine synthase D                                 | 3.57        |
| HPG27_1059 | Hypothetical protein                                           | 3.53        |
| HPG27_335  | Hypothetical protein                                           | 3.39        |
| HPG27_269  | LysA, diaminopimelate decarboxylase                            | 3.29        |
| HPG27_671  | LptB, ABC transporter                                          | 3.26        |
| HPG27_506  | CagB, cag island protein B                                     | 3.18        |
| HPG27_271  | Hypothetical protein                                           | 3.17        |
| HPG27_442  | <sup>m5</sup> C methyltransferase                              | 3.15        |
| HPG27_834  | Hypothetical protein                                           | 3.13        |
| HPG27_669  | Hypothetical protein                                           | 3.06        |
| HPG27_1331 | Hypothetical protein                                           | 2.97        |
| HPG27_377  | TsaB, tRNA A37 threonylcarbamoyladenosine modification protein | 2.96        |
| HPG27_72   | PrfA, peptide chain release factor RF-1                        | 2.96        |
| HPG27_1241 | Thiamine pyrophosphokinase                                     | 2.73        |
| HPG27_652  | AcxB, acetone carboxylase subunit alpha                        | 2.69        |
| HPG27_589  | Hypothetical protein                                           | 2.68        |
| HPG27_800  | Hypothetical protein                                           | 2.63        |
| HPG27_571  | ABC transporter, permease                                      | 2.62        |
| HPG27_47   | HypAV, type II restriction enzyme                              | 2.59        |
| HPG27_1299 | HpyAIV, type II restriction endonuclease                       | 2.59        |
| HPG27_660  | Hypothetical protein                                           | 2.57        |
| HPG27_272  | PabB, para-amino benzoate synthase                             | 2.54        |
| HPG27_670  | RpoN, RNA polymerase sigma-54 factor                           | 2.53        |
| HPG27_1524 | Hypothetical protein                                           | 2.53        |
| HPG27_1370 | Hypothetical protein                                           | 2.53        |
| HPG27_441  | <sup>m5</sup> C methyltransferase                              | 2.53        |
| HPG27_1526 | Hypothetical protein                                           | 2.53        |

|            |                                                       |      |
|------------|-------------------------------------------------------|------|
| HPG27_715  | Multidrug and toxic compound extrusion protein (MATE) | 2.52 |
| HPG27_538  | Hypothetical protein                                  | 2.51 |
| HPG27_323  | Hypothetical protein                                  | 2.51 |
| HPG27_446  | HofD, outer membrane protein                          | 2.48 |
| HPG27_971  | Hypothetical protein                                  | 2.44 |
| HPG27_42   | HypF, [NiFe]-hydrogenase maturation protein           | 2.43 |
| HPG27_1501 | Putative outer membrane lipoprotein                   | 2.43 |
| HPG27_1175 | DNA polymerase III delta prime subunit                | 2.41 |
| HPG27_1424 | Hypothetical protein                                  | 2.41 |
| HPG27_562  | FlaA, flagellin A                                     | 2.38 |
| HPG27_508  | Hypothetical protein                                  | 2.38 |
| HPG27_633  | Hypothetical protein                                  | 2.37 |
| HPG27_915  | Hypothetical protein                                  | 2.36 |
| HPG27_664  | Hypothetical protein                                  | 2.36 |
| HPG27_67   | UreB, urease beta subunit                             | 2.34 |
| HPG27_310  | Hypothetical protein                                  | 2.33 |
| HPG27_340  | FtsK, septum formation protein/cell division          | 2.32 |
| HPG27_1381 | TrxA, thioredoxin                                     | 2.32 |
| HPG27_1353 | Hypothetical protein                                  | 2.30 |
| HPG27_728  | Hypothetical protein                                  | 2.25 |
| HPG27_1459 | FecA, iron(III) dicitrate transport protein           | 2.24 |
| HPG27_972  | Hypothetical protein                                  | 2.23 |
| HPG27_400  | Hypothetical protein                                  | 2.22 |
| HPG27_66   | Urel, urea transporter                                | 2.21 |
| HPG27_960  | Hypothetical protein                                  | 2.21 |
| HPG27_1240 | PnuC                                                  | 2.18 |
| HPG27_290  | HpyHI, type II restriction endonuclease               | 2.18 |
| HPG27_146  | RfaJ-1, $\alpha(1,2/3)$ -glucosyltransferase          | 2.16 |
| HPG27_383  | AcsA, Acetyl-coenzyme A synthetase                    | 2.15 |
| HPG27_977  | Hypothetical protein                                  | 2.14 |
| HPG27_482  | Cag4                                                  | 2.11 |
| HPG27_252  | Hypothetical protein                                  | 2.11 |
| HPG27_1162 | Hypothetical protein                                  | 2.10 |
| HPG27_344  | TlyA, hemolysin                                       | 2.10 |
| HPG27_157  | MoeA, molybdopterin molybdenumtransferase             | 2.09 |
| HPG27_343  | RibC                                                  | 2.09 |
| HPG27_1280 | DnaJ, cochaperone                                     | 2.07 |
| HPG27_1373 | TdhF, thiophene and furan oxidize                     | 2.07 |
| HPG27_1338 | Hypothetical protein                                  | 2.06 |
| HPG27_651  | AcxA, alpha subunit of acetone carboxylase            | 2.06 |
| HPG27_462  | <sup>m6</sup> A methyltransferase                     | 2.06 |
| HPG27_1503 | Hypothetical protein                                  | 2.06 |
| HPG27_1203 | Hypothetical protein                                  | 2.05 |
| HPG27_946  | Hypothetical protein                                  | 2.04 |
| HPG27_1418 | Hypothetical protein                                  | 2.04 |



|            |                                               |      |
|------------|-----------------------------------------------|------|
| HPG27_200  | Hypothetical protein                          | 2.04 |
| HPG27_1089 | Hypothetical protein                          | 2.04 |
| HPG27_1282 | Hypothetical protein                          | 2.04 |
| HPG27_563  | Hypothetical protein                          | 2.03 |
| HPG27_64   | UreF, urease accessory protein                | 2.03 |
| HPG27_448  | Hypothetical protein                          | 2.02 |
| HPG27_1333 | RdxA, oxygen-insensitive NADPH nitroreductase | 2.01 |
| HPG27_725  | Hypothetical protein                          | 2.01 |
| HPG27_447  | Hypothetical protein                          | 2.01 |
| HPG27_1073 | Hypothetical protein                          | 2.01 |
| HPG27_546  | Hypothetical protein                          | 2.00 |

**Supplementary Table 3.**

Full list of the down-regulated genes in *H. pylori* G27 biofilm conditions compared to cells in planktonic conditions (cutoff ratio  $\geq 1$  log<sub>2</sub> fold change and p-value <0.05) using RNA-seq analysis, grouped by functional role categories.

| Name       | Product                                                         | Fold change |
|------------|-----------------------------------------------------------------|-------------|
| HPG27_256  | Ferredoxin                                                      | -4.39       |
| HPG27_516  | Hypothetical protein                                            | -3.01       |
| HPG27_1015 | Zinc-metalloprotease                                            | -2.86       |
| HPG27_1271 | Hypothetical protein                                            | -2.84       |
| HPG27_1035 | Pseudo uridylylate synthase I                                   | -2.71       |
| HPG27_1180 | Hypothetical protein                                            | -2.62       |
| HPG27_1008 | SodB, iron-dependent superoxide dismutase                       | -2.61       |
| HPG27_591  | Mda66, modulator of drug activity                               | -2.60       |
| HPG27_527  | Hypothetical protein                                            | -2.57       |
| HPG27_937  | Hypothetical protein                                            | -2.56       |
| HPG27_338  | KgtP, alpha-ketoglutarate permease                              | -2.47       |
| HPG27_1314 | Type III restriction enzyme M protein                           | -2.45       |
| HPG27_277  | AibA, AI-2 periplasmic binding protein                          | -2.41       |
| HPG27_1376 | Hypothetical protein                                            | -2.39       |
| HPG27_1044 | Glk, glucokinase                                                | -2.36       |
| HPG27_548  | OorD, 2-oxoglutarate oxidoreductase subunit                     | -2.36       |
| HPG27_1205 | NADH-ubiquinone oxidoreductase chain A                          | -2.35       |
| HPG27_783  | TrxA, thioredoxin                                               | -2.33       |
| HPG27_1125 | Hypothetical protein                                            | -2.32       |
| HPG27_957  | Cyclopropane fatty acid synthase                                | -2.31       |
| HPG27_1329 | Biotin synthetase                                               | -2.31       |
| HPG27_887  | Hypothetical protein                                            | -2.31       |
| HPG27_521  | Ribosomal protein S21                                           | -2.29       |
| HPG27_1156 | Hypothetical protein                                            | -2.25       |
| HPG27_1206 | NuoB, NADH oxidoreductase I                                     | -2.25       |
| HPG27_1273 | FumC, fumarase                                                  | -2.22       |
| HPG27_469  | Urease-enhancing factor                                         | -2.21       |
| HPG27_549  | OorA, 2-oxoglutarate oxidoreductase subunit                     | -2.19       |
| HPG27_279  | DppC, dipeptide transport system permease protein               | -2.14       |
| HPG27_1007 | Adhesin-thiol peroxidase                                        | -2.14       |
| HPG27_306  | FlgH, flagellar L-ring protein precursor                        | -2.14       |
| HPG27_1269 | RpsJ, 30S ribosomal protein S10                                 | -2.13       |
| HPG27_794  | DNA-binding protein HU                                          | -2.12       |
| HPG27_1042 | Zwf, glucose-6-phosphate dehydrogenase                          | -2.11       |
| HPG27_629  | Hypothetical protein                                            | -2.10       |
| HPG27_1514 | YaeE, amino acid ABC transporter                                | -2.09       |
| HPG27_1517 | LpxF, Lipid A 4'-phosphatase                                    | -2.08       |
| HPG27_91   | TlpA, methyl-accepting chemotaxis transmembrane sensory protein | -2.08       |

|            |                                                        |       |
|------------|--------------------------------------------------------|-------|
| HPG27_526  | Membrane protein belonging to AI-2E family transporter | -2.04 |
| HPG27_1272 | Ribonuclease HII                                       | -2.03 |
| HPG27_762  | Metalloprotease                                        | -2.03 |
| HPG27_24   | Icd, Isocitrate dehydrogenase                          | -2.02 |
| HPG27_679  | L-asparaginase II                                      | -2.00 |

**Supplementary Table 4.**

**List of primer used in the present study.**

| Primer                     | Sequence 5' to 3'                  | Product length |
|----------------------------|------------------------------------|----------------|
| Fw_ <i>lctP</i>            | CGCTTGGATTGTGATCGCTG               | 164            |
| Rv_ <i>lctP</i>            | CGACTAAAATCGCCGCTGTG               |                |
| Fw_ HPG27_526              | GGGGTCTTGCCTCTTGAAT                | 187            |
| Rv_ HPG27_526              | CCAAAGACGCTAGGCCGTAT               |                |
| Fw_ <i>virC1</i>           | GTTTGCCCAATTCACGCTCT               | 181            |
| Rv_ <i>virC1</i>           | ATGTCTAGTTGGCTTGGCGT               |                |
| Fw_ <i>virB11</i>          | GGTGGCACAGCTAGTGGTAA               | 200            |
| Rv_ <i>virB11</i>          | GGAGACATTCTCATAGCCGCA              |                |
| Fw_ <i>hopC</i>            | GCGACTGGTTCAGATGGTCA               | 153            |
| Rv_ <i>hopC</i>            | ATCCCAATGTTGGCGGCTA                |                |
| Fw_16S                     | ATGGATGCTAGTTGTTGGAGGGCT           | 185            |
| Rv_16S                     | TTAAACCACATGCTCCACCGCTTG           |                |
| Fw_ <i>Cat</i> *           | TATGATATAGTGGATAGATTTATGATATAAT    | 970            |
| Rv_ <i>Cat</i> *           | TCCGCAGGACGCACTACTCTCGGCAGA        |                |
| Fw_ <i>Kan</i> *           | GGCCGGATCCGATAAACCCAGCGAACC        | 1410           |
| Rv_ <i>Kan</i> *           | GGCCAAGCTTTTTAGACATCTAAATC         |                |
| CAT Tn7 Up <sup>#,§</sup>  | ACTTTATTGTCATAGTTTAGATCTATTTTG     |                |
| CAT Tn7 Dw <sup>#,§</sup>  | ATAATCCTTAAAACTCCATTTCCACCCCT      |                |
| CAT Tn7 Up2 <sup>*,§</sup> | TCAGTTTAAGACTTTATTGTC              |                |
| CAT Tn7 Dw2 <sup>*,§</sup> | CAGTTCCCACTATTTTGTC                |                |
| Random 1 <sup>#</sup>      | GGCCACGCGTCGACTAGTACNNNNNNNNNAGAG  |                |
| Random 2 <sup>#</sup>      | GGCCACGCGTCGACTAGTACNNNNNNNNNACGCC |                |
| Random PCR 2 <sup>§</sup>  | GGCCACGCGTCGACTAGTAC               |                |

\* Primers for antibiotic resistance cassette

# First PCR using CAT Tn7 Up or CAT Tn7 Dw with Random 1 or Random 2

§ Second PCR using CAT Tn7 Up2 or CAT Tn7 Dw2 and Random PCR2

§ Salama, Shepherd et al. 2004
